# Supplementary material
Source: HighWire-hosted journal article supplement (https://jnm.snmjournals.org/highwire/filestream/94138/field_highwire_adjunct_files/0/81620_Supplemental_Data.pdf)
Supplement: 81620_Supplemental_Data.pdf [file 81620_Supplemental_Data.pdf]

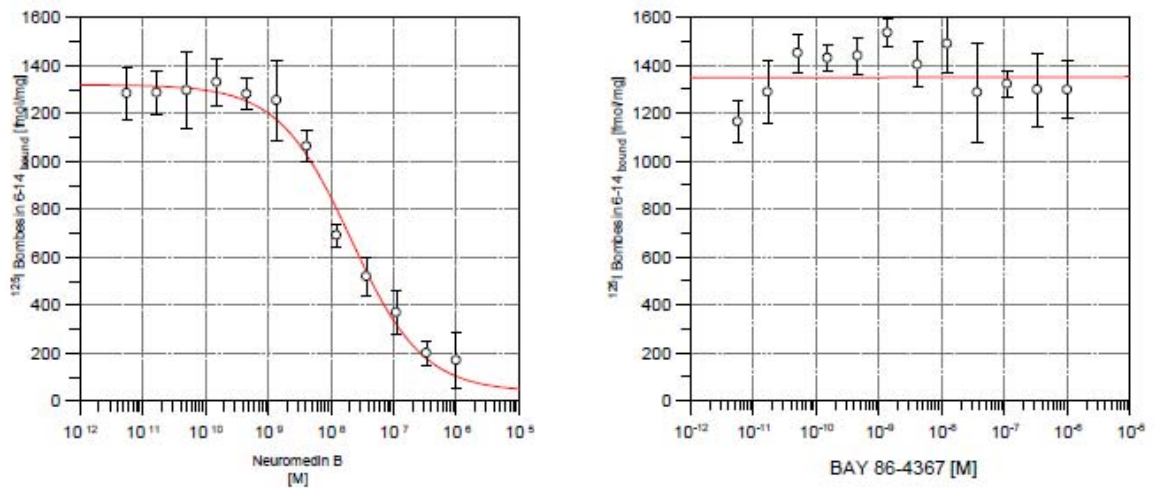

Supplemental Figure 1: Competitive binding of BAY 86-4367 against the radioligand  $^{125}\text{I}$ -Tyr<sup>4</sup>-Bombesin in a scintillation proximity assay (SPA) using membranes of NMBr-transfected cells in comparison to NMB.

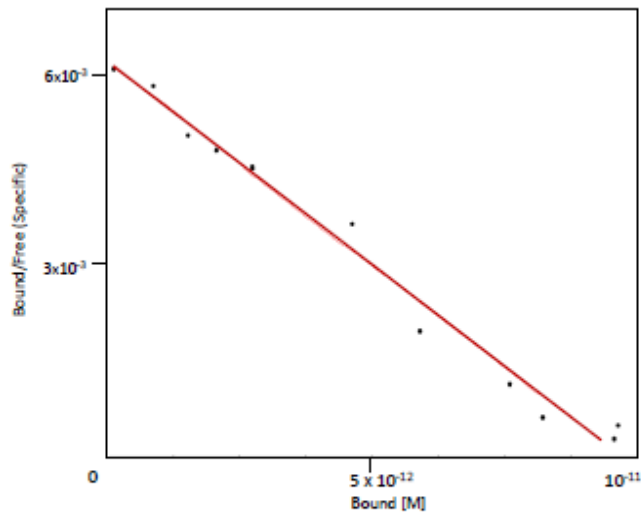

Supplemental Figure 2: Representative Scatchard plot of saturation binding of the  $^{18}\text{F}$ -bombesin peptide to PC-3 cells.

## Antagonist Characterization

Antagonistic properties were determined via receptor-internalization in hGRPr-transfected HEK-cells by immunofluorescence-microscopy (Ref. 24) or intracellular calcium-mobilization in PC-3 cells (Ref. 25) induced by the natural agonist bombesin and competitively inhibited by BAY 86-4367. Antagonist assays were carried out in the laboratory of Prof. J.-C. Reubi (University Bern, Switzerland).

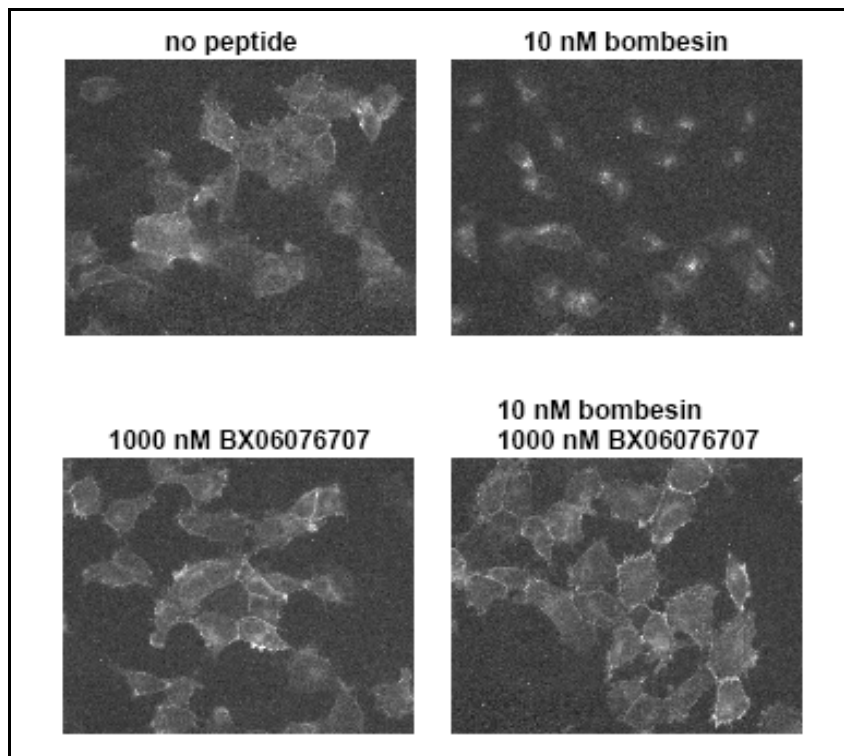

Supplemental Figure 3a: Immunofluorescence of GRPr internalization in GRPr-transfected HEK-cells induced by the agonist bombesin and effectively inhibited by the antagonist BAY 86-4367. (top-left: non-complexed GRPr at the cell membrane, top-right: GRPr internalization after complexation with the agonistic ligand bombesin, down-left: GRPr complexed with BAY 86-4367 (=BX06076707) at the cell membrane without internalization, down-right: blocking of the Tyr<sup>4</sup>-bombesin induced GRPr internalization by BAY 86-4367)

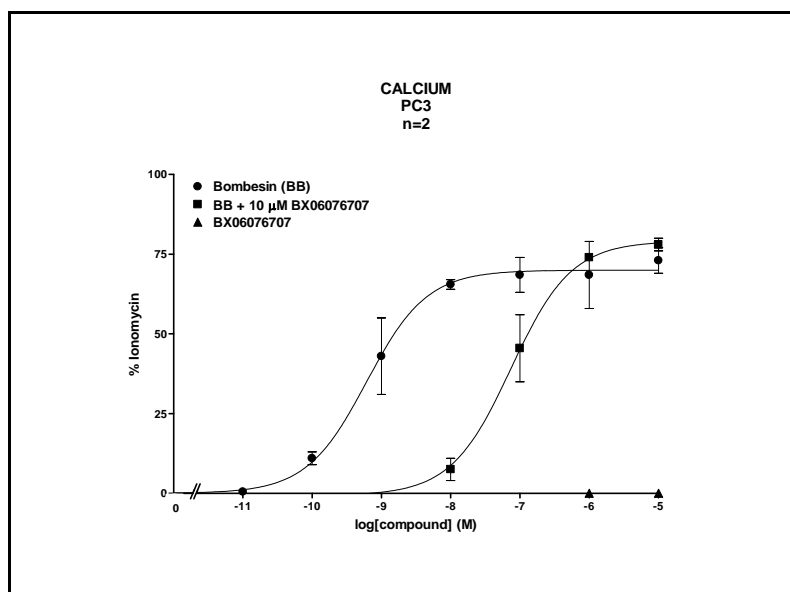

Supplemental Figure 3b: Intracellular calcium mobilization induced in P-C3 cells (two independent experiments with each n=3; SD). Cells were loaded with Fluo-4 dye as described and analyzed for calcium mobilization in response either to Tyr<sup>4</sup>-bombesin, or to BAY 86-4367 (=BX06076707). Maximum calcium response was obtained by treating the cells with ionomycin (100% value). Results are shown as percentage of maximum calcium response induced by ionomycin.

### GRPr Selectivity via autoradiography

Autoradiographic experiments were carried out in the laboratory of Prof. J.C. Reubi (University Bern, Switzerland). Frozen human cancer tissue samples (prostate cancer, ileal carcinoid, bronchial carcinoid) [according to Waser B, Eltschinger V, Linder K, Eur J Nucl Med Mol Imaging, 2007, 34: 95–100] were prepared and processed as described above in the binding affinity section. The selectivity of BAY 86-4367 was then tested in these human tumor tissue selectively expressing one of the three bombesin receptor subtypes using the universal radioligand [<sup>125</sup>I]-[D-Tyr<sup>6</sup>,β-Ala<sup>11</sup>,Phe<sup>13</sup>,Nle<sup>14</sup>]-bombesin-(6-14) competitively inhibited by BAY 86-4367 in a concentration range from 0.1 – 10,000nM.

**Table 1: Bombesin receptor subtype profile as determined by receptor-autoradiography with human prostate cancer (GRPr), ileal carcinoid (NMBr) and bronchial carcinoid (BBR3) tissue samples. The binding affinities of BAY 86-4367 were measured competing against the radioligand [<sup>125</sup>I]-bombesin 6-14 (binding to all bombesin-receptor subtypes)**

|                         |                                                                                                                      |               |
|-------------------------|----------------------------------------------------------------------------------------------------------------------|---------------|
| <b>Tracer:</b>          | <sup>125</sup> I-[D-Tyr <sup>6</sup> , β-Ala <sup>11</sup> , Phe <sup>13</sup> , Nle <sup>14</sup> ]-bombesin (6-14) |               |
| <b>Tissue:</b>          | Human cancers selectively expressing one of the 3 bombesin receptor subtypes                                         |               |
|                         | <b>BAY 86-4367</b> (for comparison)                                                                                  |               |
| <b>IC<sub>50</sub>:</b> | <b>GRP-R :</b>                                                                                                       | 7.8 - 13.0 nM |
|                         | <b>BB 3 :</b>                                                                                                        | > 10,000 nM   |
|                         | <b>NMB – R :</b>                                                                                                     | > 1,000 nM    |

## Further Biodistributions

**Table 1: Biodistribution of <sup>18</sup>F-BAY 86-4367 in PC-3-bearing mice (time points 0.5-4 h). Biodistribution data of various organs are expressed as % ID/ g values, recovery analysis as %ID. (mean ± SD, n = 3)**

| Timepoint :                  | 0.5 h       |             | 1 h          |             | 2 h          |             | 4 h          |             |
|------------------------------|-------------|-------------|--------------|-------------|--------------|-------------|--------------|-------------|
| % ID/ g                      | S.D.        |             | S.D.         |             | S.D.         |             | S.D.         |             |
| Spleen                       | 0.55        | 0.20        | 0.30         | 0.05        | 0.39         | 0.06        | 0.07         | 0.01        |
| Liver                        | 1.70        | 0.31        | 0.94         | 0.07        | 0.57         | 0.14        | 0.36         | 0.06        |
| Kidneys                      | 3.98        | 0.40        | 1.68         | 0.26        | 1.36         | 0.20        | 0.81         | 0.44        |
| Lung                         | 0.72        | 0.14        | 0.39         | 0.03        | 0.30         | 0.09        | 0.11         | 0.02        |
| Bone*                        | 0.91        | 0.08        | 1.22         | 0.12        | 2.20         | 0.39        | 2.75         | 0.79        |
| Heart                        | 0.42        | 0.10        | 0.20         | 0.02        | 0.14         | 0.02        | 0.07         | 0.03        |
| Brain                        | 0.04        | 0.01        | 0.03         | 0.01        | 0.03         | 0.00        | 0.02         | 0.00        |
| Fat                          | 0.15        | 0.03        | 0.11         | 0.07        | 0.04         | 0.02        | 0.05         | 0.05        |
| Thyroid                      | 0.74        | 0.16        | 0.50         | 0.04        | 0.52         | 0.06        | 0.62         | 0.22        |
| Gallbladder                  | 31.12       | 1.65        | 58.51        | 5.03        | 29.38        | 7.06        | 31.21        | 5.76        |
| Muscle                       | 0.19        | 0.01        | 0.10         | 0.02        | 0.06         | 0.04        | 0.03         | 0.01        |
| Tumor                        | <b>5.59</b> | <b>1.35</b> | <b>4.20</b>  | <b>2.40</b> | <b>5.00</b>  | <b>1.45</b> | <b>5.01</b>  | <b>1.20</b> |
| Skin*                        | 0.74        | 0.17        | 0.33         | 0.10        | 0.24         | 0.13        | 0.13         | 0.03        |
| Blood                        | 0.80        | 0.13        | 0.34         | 0.03        | 0.23         | 0.03        | 0.13         | 0.02        |
| Tail                         | 2.20        | 1.80        | 1.15         | 0.21        | 1.31         | 0.85        | 0.68         | 0.08        |
| Stomach                      | 3.08        | 0.05        | 2.22         | 0.52        | 2.16         | 0.27        | 1.98         | 0.17        |
| Prostate                     | 7.15        | 6.95        | 0.71         | 0.90        | 1.29         | 1.86        | 0.03         | 0.03        |
| Intestine                    | 5.98        | 1.09        | 4.30         | 0.52        | 3.58         | 0.68        | 2.39         | 0.61        |
| Pancreas                     | 48.82       | 7.22        | 43.03        | 8.01        | 26.21        | 5.09        | 18.74        | 2.98        |
| Adrenals                     | 2.19        | 0.36        | 1.03         | 0.38        | 0.61         | 0.27        | 0.20         | 0.15        |
| <b>Summary % ID</b>          |             |             |              |             |              |             |              |             |
| Recovery                     | 90.75       | 3.31        | 97.48        | 0.94        | 93.24        | 17.04       | 92.57        | 4.34        |
| Organs                       | 43.75       | 1.64        | 31.30        | 1.05        | 24.55        | 3.53        | 16.16        | 1.04        |
| Carcass                      | 19.46       | 1.44        | 10.50        | 0.78        | 11.46        | 0.91        | 9.76         | 0.43        |
| Urine                        | 27.51       | 2.51        | 52.18        | 0.79        | 57.88        | 15.02       | 68.77        | 2.54        |
| Faeces                       | -           | -           | 3.49         | 1.44        | 1.91         | 2.13        | 1.95         | 1.60        |
| <b>Tumor / Tissue ratios</b> |             |             |              |             |              |             |              |             |
| T / Liver                    | 3.38        | 1.01        | 4.49         | 2.54        | 8.70         | 0.84        | 14.13        | 3.45        |
| T / Kidneys                  | 1.40        | 0.28        | 2.59         | 1.75        | 3.64         | 0.70        | 7.31         | 3.05        |
| T / Blood                    | <b>7.32</b> | <b>3.07</b> | <b>12.75</b> | <b>8.08</b> | <b>21.91</b> | <b>3.62</b> | <b>39.19</b> | <b>6.04</b> |
| T/ Muscle                    | 29.87       | 6.36        | 47.91        | 38.32       | 90.59        | 41.21       | 164.11       | 66.27       |
| T/ Bone                      | 6.17        | 1.43        | 3.58         | 2.41        | 2.38         | 1.03        | 1.98         | 0.98        |

\* Tissue aliquots only

**Table 2: Biodistribution of <sup>18</sup>F-BAY 86-4367 in LNCaP-bearing mice (timepoints 0.5-4 h). Biodistribution data of various organs are expressed as % ID/ g values, recovery analysis as %ID. (mean ± SD, n = 3)**

| Timepoint :                  | 0.5 h       |             | 1 h         |             | 2 h          |             | 4 h          |             |
|------------------------------|-------------|-------------|-------------|-------------|--------------|-------------|--------------|-------------|
| % ID/ g                      | S.D.        |             | S.D.        |             | S.D.         |             | S.D.         |             |
| Spleen                       | 0.70        | 0.49        | 0.40        | 0.03        | 0.33         | 0.22        | 0.18         | 0.06        |
| Liver                        | 2.03        | 0.68        | 0.69        | 0.01        | 0.41         | 0.03        | 0.22         | 0.12        |
| Kidneys                      | 2.93        | 0.70        | 1.69        | 0.11        | 0.78         | 0.11        | 0.68         | 0.30        |
| Lung                         | 0.87        | 0.09        | 0.47        | 0.05        | 0.19         | 0.04        | 0.12         | 0.04        |
| Bone*                        | 0.81        | 0.23        | 1.42        | 0.14        | 1.60         | 0.52        | 1.15         | 0.27        |
| Heart                        | 0.48        | 0.11        | 0.23        | 0.05        | 0.10         | 0.02        | 0.05         | 0.02        |
| Brain                        | 0.04        | 0.01        | 0.03        | 0.00        | 0.03         | 0.01        | 0.02         | 0.01        |
| Fat                          | 1.39        | 0.41        | 0.59        | 0.62        | 0.11         | 0.18        | 1.62         | 2.72        |
| Thyroid                      | 0.57        | 0.18        | 0.57        | 0.12        | 0.28         | 0.10        | 0.41         | 0.27        |
| Gallbladder                  | 41.58       | 16.05       | 21.75       | 30.81       | 32.91        | 22.39       | 1.33         | 0.42        |
| Muscle                       | 0.20        | 0.03        | 0.13        | 0.03        | 0.04         | 0.01        | 0.04         | 0.02        |
| Tumor                        | <b>3.27</b> | <b>1.89</b> | <b>2.28</b> | <b>0.19</b> | <b>2.01</b>  | <b>0.23</b> | <b>1.41</b>  | <b>0.45</b> |
| Skin*                        | 1.47        | 1.07        | 0.54        | 0.23        | 0.20         | 0.05        | 0.27         | 0.23        |
| Blood                        | 0.97        | 0.17        | 0.38        | 0.04        | 0.19         | 0.02        | 0.09         | 0.02        |
| Tail                         | 1.88        | 0.43        | 0.89        | 0.04        | 1.14         | 0.23        | 0.65         | 0.12        |
| Stomach                      | 3.91        | 1.18        | 2.76        | 0.30        | 2.15         | 0.49        | 2.18         | 0.33        |
| Prostate                     | 0.75        | 0.29        | 0.46        | 0.19        | 0.13         | 0.15        | 3.05         | 4.95        |
| Intestine                    | 4.65        | 0.72        | 5.08        | 0.13        | 3.21         | 0.69        | 1.92         | 0.36        |
| Pancreas                     | 50.08       | 11.91       | 35.61       | 2.75        | 33.72        | 3.65        | 19.23        | 4.78        |
| Adrenals                     | 3.31        | 1.35        | 2.48        | 1.23        | 0.86         | 0.40        | 0.70         | 0.66        |
| <b>Summary % ID</b>          |             |             |             |             |              |             |              |             |
| Recovery                     | 90.19       | 2.66        | 90.89       | 3.78        | 91.09        | 3.27        | 94.10        | 3.21        |
| Organs                       | 43.63       | 4.98        | 33.88       | 2.33        | 22.15        | 3.49        | 14.38        | 3.23        |
| Carcass                      | 12.23       | 1.40        | 11.66       | 6.58        | 7.77         | 1.76        | 10.85        | 5.43        |
| Urine                        | 34.31       | 3.57        | 45.25       | 12.42       | 63.69        | 3.01        | 68.01        | 1.18        |
| Faeces                       | -           | -           | 0.10        | 0.15        | 0.83         | 0.63        | 3.66         | 3.32        |
| <b>Tumor / Tissue ratios</b> |             |             |             |             |              |             |              |             |
| T / Liver                    | 1.73        | 1.06        | 3.31        | 0.25        | 4.83         | 0.39        | 7.40         | 3.68        |
| T / Kidneys                  | 1.09        | 0.54        | 1.35        | 0.19        | 2.58         | 0.09        | 2.67         | 2.08        |
| T / Blood                    | <b>3.21</b> | <b>1.49</b> | <b>6.03</b> | <b>0.95</b> | <b>10.43</b> | <b>0.49</b> | <b>15.31</b> | <b>5.40</b> |
| T/ Muscle                    | 15.87       | 7.58        | 19.22       | 6.85        | 53.06        | 19.50       | 34.49        | 4.02        |
| T/ Bone                      | 3.82        | 1.48        | 1.62        | 0.23        | 1.37         | 0.58        | 1.33         | 0.68        |

\* Tissue aliquots only
